# Supplementary material for: Base editing strategy for insertion of the A673T mutation in the APP gene to prevent the development of AD in vitro
Source: PubMed Central journal article supplement — Mol Ther Nucleic Acids. 2021 Mar 1;24:253–63. doi: 10.1016/j.omtn.2021.02.032 (PMC7985668; doi:10.1016/j.omtn.2021.02.032), 2021-03-01
Supplement: mmc1.pdf [file mmc1.pdf]

OMTN, Volume 24

## Supplemental information

### Base editing strategy for insertion of the A673T mutation in the APP gene to prevent the development of AD *in vitro*

Antoine Guyon, Joël Rousseau, Francis-Gabriel Bégin, Tom Bertin, Gabriel Lamothe, and Jacques P. Tremblay

SUPPLEMENTAL RESULTS:

Table S1: List of sgRNA used in the study.

---

SpCas9 VQR/EQR sgRNAs targeting sequences of 17 to 22 nucleotides tested:

sgRNA 22bp ATTCTGCATCCATCTTCACTTC

sgRNA 21bp TTCTGCATCCATCTTCACTTC

sgRNA 20bp TCTGCATCCATCTTCACTTC

sgRNA 19bp CTGCATCCATCTTCACTTC

sgRNA 18bp TGCATCCATCTTCACTTC

sgRNA 17bp GCATCCATCTTCACTTC

SaCas9 sgRNAs tested:

sgRNA 22bp ATTCTGCATCCATCTTCACTTC

sgRNA 21bp TTCTGCATCCATCTTCACTTC

sgRNA 20bp TCTGCATCCATCTTCACTTC

sgRNA 19bp CTGCATCCATCTTCACTTC

sgRNA 18bp TGCATCCATCTTCACTTC

sgRNA 17bp GCATCCATCTTCACTTC

---

Table S2: Example of Deep-Sequencing analysis. Indels calculated with the script2 of Figure S7.

|                                  | Target-AID-SpCas9nVQR 19 | BE3_SpCas9nVQR 19 |
|----------------------------------|--------------------------|-------------------|
| Total reads                      | 100%                     | 100%              |
| Wild-Type                        | 39,3                     | 66,0              |
| C1                               | 4,8                      | 1,0               |
| C2                               | 3,8                      | 0,3               |
| C3                               | 0,1                      | 3,6               |
| C4                               | 0,4                      | 0,0               |
| C5                               | 0,8                      | 0,3               |
| C1+C2                            | 36,3                     | 0,0               |
| C1+C3                            | 0,3                      | 2,1               |
| C1+C4                            | 0,1                      | 0,0               |
| C1+C5                            | 0,2                      | 0,0               |
| C2+C3                            | 0,1                      | 0,2               |
| C2+C4                            | 0,1                      | 0,0               |
| C2+C5                            | 0,3                      | 0,0               |
| C3+C4                            | 0,0                      | 0,2               |
| C3+C5                            | 0,0                      | 0,2               |
| C4+C5                            | 0,4                      | 0,0               |
| C1+C2+C3                         | 2,3                      | 1,0               |
| C1+C2+C4                         | 0,8                      | 0,0               |
| C1+C2+C5                         | 5,5                      | 0,0               |
| C2+C4+C5                         | 1,8                      | 0,0               |
| C2+C3+C5                         | 0,0                      | 0,0               |
| C1+C2+C3+C4                      | 0,6                      | 0,1               |
| C2+C3+C4+C5                      | 0,3                      | 0,2               |
| C1+C3+C4+C5                      | 0,0                      | 0,0               |
| C1+C2+C4+C5                      | 0,5                      | 0,1               |
| C1+C2+C3+C5                      | 0,6                      | 0,0               |
| C1+C2+C3+C4+C5                   | 0,4                      | 0,2               |
| Global C2                        | 53,3                     | 2,5               |
| Global C2 (excluding C3 and C4)) | 42,6                     | 0,4               |
| Indels                           | 1,4                      | 2,6               |
| Total                            | 75,60%                   | 75,70%            |
| Mis-sequencing                   | 24,40%                   | 24,30%            |

Table S3: Percentage of reduction of A $\beta$ 40 and A $\beta$ 42 peptides secretion induced by the addition of the A673T mutation to wild type APP gene or to an APP gene containing the London mutation. Last column shows the percentage of reduction induced by the addition of E674K and A673T (C1+C2) mutations to wild type APP gene. The addition of the A673T mutation reduced the production of A $\beta$ 40 and A $\beta$ 42 peptides in all 3 situations. Experiment performed in SH-SY5Y transfected with plasmids containing an APP695 cDNA. Results from Guyon et al. 2020 (DOI: 10.1371/journal.pone.0237122 )

| FAD mutation         | APPWT | APPV717I | APPC1+C2 |
|----------------------|-------|----------|----------|
| Abeta42 Decrease (%) | -46   | -65      | -53      |
| Abeta40 Decrease (%) | -63   | -81      | -44      |

Figure S1.

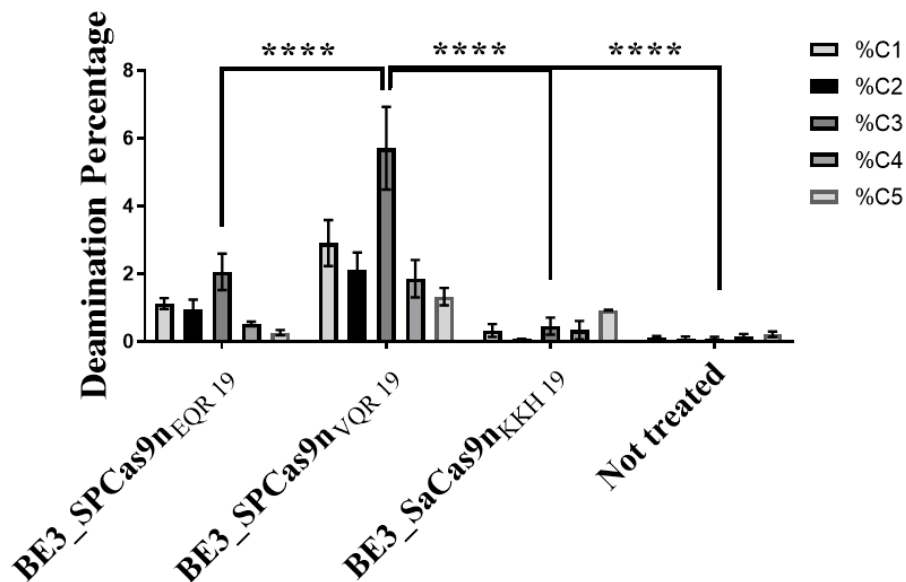

Figure S1: Percentages of cytidine deamination produced by various enzymes and sgRNAs.

BE3\_SpCas9nEQR, BE3\_SpCas9nVQR, BE3\_SaCas9nKKH enzymes tested in SH-SY5Y cells. The figure illustrates the means  $\pm$  SEM (n=4). Statistical test: two-way ANOVA Tukey's multiple comparisons test (n=4). P value style \*\*\*\* p<0.0001.

Figure S2.

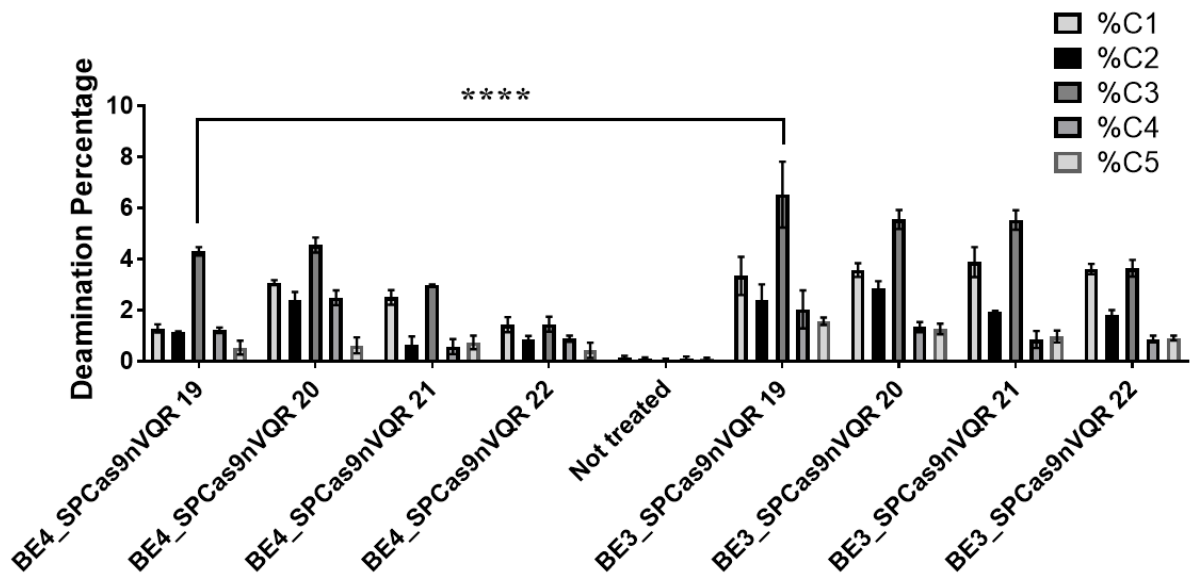

Figure S2: Percentages of cytidine deamination produced by various enzymes and sgRNAs.

BE4\_SpCas9nVQR and BE3\_SpCas9nVQR enzymes test in SH-SY5Y cells. The figure illustrates the means +/- SEM (n=3). Statistical test: two-way ANOVA Tukey's multiple comparisons test (n=3). P value style \*\*\*\* p<0.0001.

Figure S3.

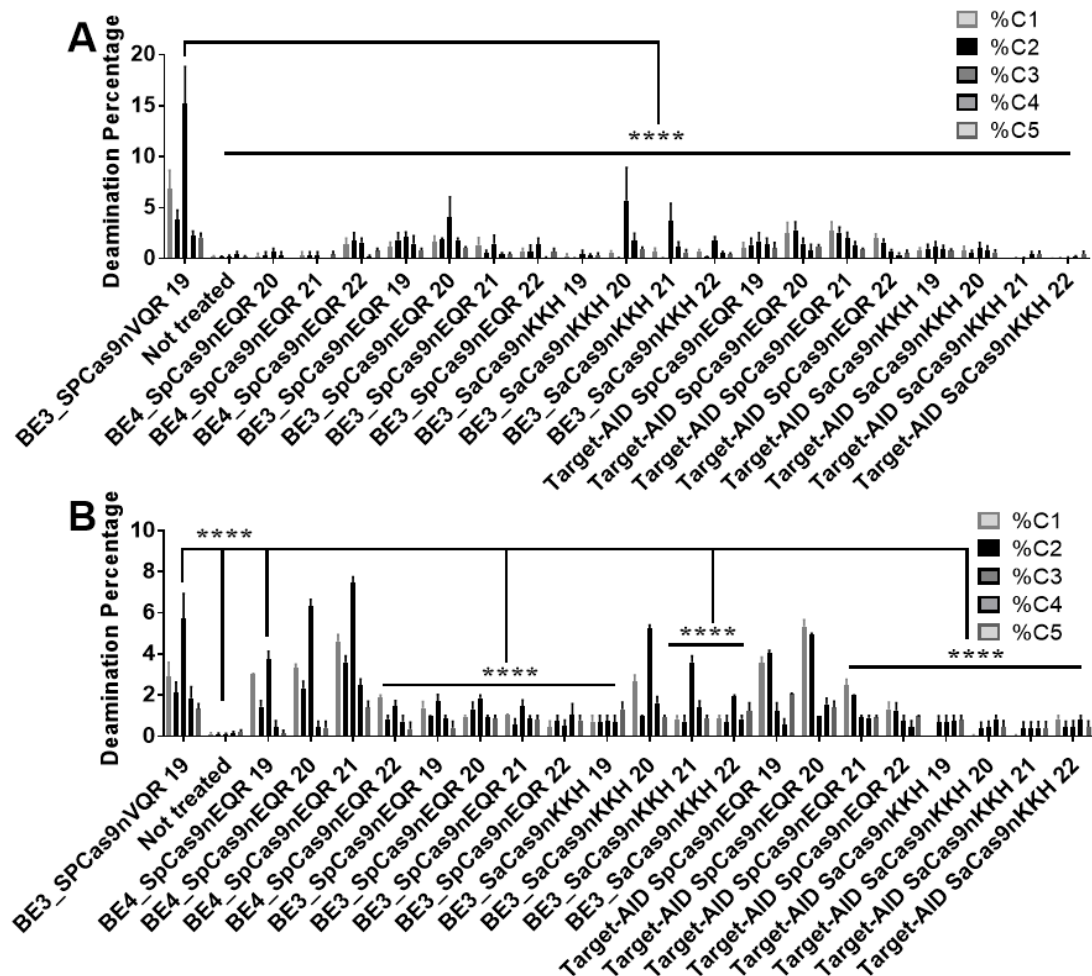

Figure S3: Percentages of cytosine deamination produced by BE3\_SpCas9nVQR, BE4\_SpCas9nEQR, BE3\_SpCas9nEQR, BE3\_SaCas9nKKH, Target-AID\_SpCas9nEQR, Target-AID\_SaCas9nKKH enzymes. In **A**, test in HEK293T cells. In **B**, test in SH-SY5Y. The figure illustrates the means  $\pm$  SEM (n=3). Statistical test: two-way ANOVA Tukey's multiple comparisons test (n=3). P value style \*\*\*\*  $p < 0.0001$ .

Figure S4.

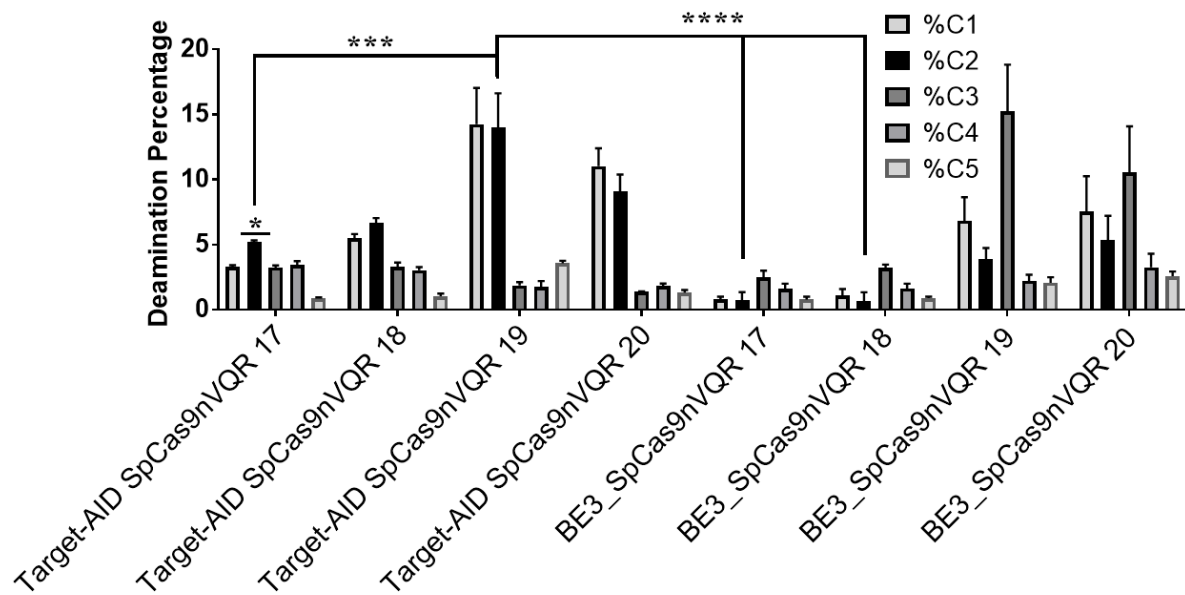

Figure S4: **Deamination efficiencies using various Cas9n-deaminases and sgRNAs targeting various numbers of nucleotides.** The difference of deamination in HEK293T cells of cytidines C1 to C5 produced by the Target-AID-SpCas9nVQR and BE3\_SpCas9nVQR enzymes and two copies of a sgRNA targeting 17 to 20 nucleotides. The figure illustrates the means +/- SEM (n=3). Statistical test: two-way ANOVA Tukey's multiple comparisons test (n=3). P value style \*\*\* p<0.0002, \*\*\*\* p<0.0001.

Figure S5

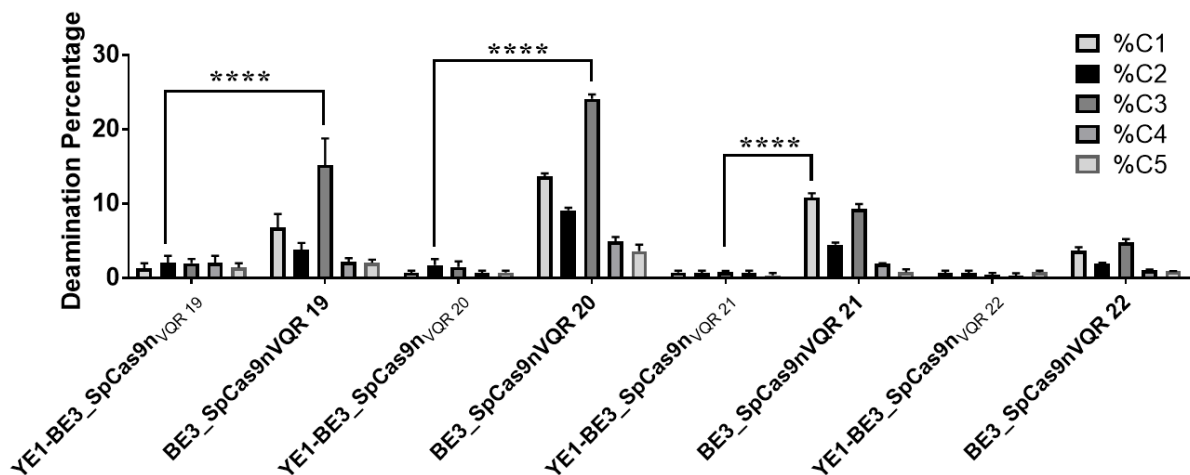

Figure S5: **Deamination efficiencies using various Cas9n-deaminases and sgRNAs targeting various numbers of nucleotides.** Difference between YE1-BE3\_SpCas9nVQR and BE3\_SpCas9nVQR in HEK293T cells. The figure illustrates the means +/- SEM (n=4). Statistical test: two-way ANOVA Tukey's multiple comparisons test (n=4). P value style \*\*\*\* p<0.0001.

Figure S6:

| Sequence             | PAM  | Score▼ | Gene                     | Locus            |
|----------------------|------|--------|--------------------------|------------------|
| CTGCATCCATCTTCACTTC  | AGAG | 100.0  | APP (ENSG00000142192)    | chr21:+25897633  |
| CTGAAGCCATCTTCACTTC  | GGAG | 1.4    |                          | chr5:-74133250   |
| CTGCCTCCATCTTCACTG   | TGAG | 0.5    |                          | chr11:+70758797  |
| CTGCTTCCAACCTTCACTTT | GGAG | 0.5    | SPOCK2 (ENSG00000107742) | chr10:-72059638  |
| CAGGATCCATCTTAACTTC  | TGAG | 0.4    |                          | chr12:-47654519  |
| CTGCTTCCATCTTCTGTTC  | AGAG | 0.4    |                          | chr3:-36729648   |
| CTGCATCCTTCTCCACTTG  | GGAG | 0.4    |                          | chr8:-67603274   |
| CTGAATCAATCTCCACTTC  | AGAG | 0.4    |                          | chr12:-56572869  |
| ATCCATGCATCTTCACTTC  | AGAG | 0.3    |                          | chr11:-20359838  |
| CTGCCCCCACTTCACTTC   | TGAG | 0.3    |                          | chr9:-85398673   |
| CTGCATCCATCTCTCCTTC  | AGAG | 0.3    |                          | chr3:+176747607  |
| CTATTCCATCTTCACTTC   | AGAG | 0.3    |                          | chr9:-21442550   |
| ATGTATCCATCTTCACTGT  | TGAG | 0.1    |                          | chr14:-35505959  |
| TTTCATCCATCTCCACTTT  | AGAG | 0.1    |                          | chr5:-44542656   |
| TTTCATCCATCTTAACTAC  | AGAG | 0.1    |                          | chr10:-120808163 |
| ATCCATCCACTTCACTTG   | TGAG | 0.1    |                          | chr4:+10179124   |

Figure S6: Off target analysis performed with Crispr.mit.edu algorithm (Hsu et al. 2014)

Figure S7:

**Script1.sh:**

```
(echo -n "Sample#n#"; for i in $(cat list);do echo -n "$i#" ;done; echo; for j in $(ls *.bam);do echo -n "$j#";
samtools view $j |wc -l| awk '{printf $1 "\t"}';for i in $(cat list);do samtools view $j | grep -c $i | awk '{printf $1
"\t"}'; done; echo; done)|sed s/#/\t/g
```

List associated with Script1.sh:

|                 |                 |
|-----------------|-----------------|
| ATTCTGCATCCATCT | ATTCTGCATCTATTT |
| ATTTTGCATCCATCT | ATTCTGCATCCATTT |
| ATTCTGTATCCATCT | ATTTTGTATTCATCT |
| ATTCTGCATTCATCT | ATTTTGTATCTATCT |
| ATTCTGCATCTATCT | ATTTTGTATCCATTT |
| ATTCTGCATCCATTT | ATTCTGTATTTATCT |
| ATTTTGTATCCATCT | ATTCTGTATCTATTT |
| ATTTTGCATTCATCT | ATTCTGTATTCATTT |
| ATTTTGCATCTATCT | ATTTTGTATTTATCT |
| ATTTTGCATCCATTT | ATTCTGTATTTATTT |
| ATTCTGTATTCATCT | ATTTTGCATTTATTT |
| ATTCTGTATCTATCT | ATTTTGTATCTATTT |
| ATTCTGTATCCATTT | ATTTTGTATTCATTT |
| ATTCTGCATTTATCT | ATTTTGTATTTATCT |
| ATTCTGCATTCATTT | ATTTTGTATTTATTT |
| ATTCTGCATCTATCT |                 |

**Script2.sh:**

Part1:

```
for i in $(ls *.bam);do samtools view $i |grep -o TGAGTCAT.*CGTCTGA|sort|uniq -c| awk '{print $2 "\t" $1}'  
> $i.count;done
```

Part2:

```
ls *.count|perl Parse2Table.pl 1 > 20170629_Counts.tsv
```

Figure S7: **Deep sequencing file analysis script.** Script1 allows you to find a specific sequence in a NGS file. The sequences are inserted into an attached "list" file. Script 2 allows to see all sequences between two specific areas of the genome by modifying the highlighted bases. Commonly used to calculate indels. The same results can be achieved with CRISPResso2 but with less details and research versatility.
